# Supplementary material for: Human serum from SARS-CoV-2-vaccinated and COVID-19 patients shows reduced binding to the RBD of SARS-CoV-2 Omicron variant
Source: Springer Nature journal article supplement (doi:10.1186/s12916-022-02312-5), 2022-03-02

## Additional File 1: Supplementary Figures

**Figure S1: SDS-PAGE of the RBD25 variants.** 2  $\mu\text{g}$  of the indicated purified RBD25 variant in Laemmli buffer containing 5 % beta-mercaptoethanol were heated to 95°C for 10 min and run on 15% SDS-PAGE.

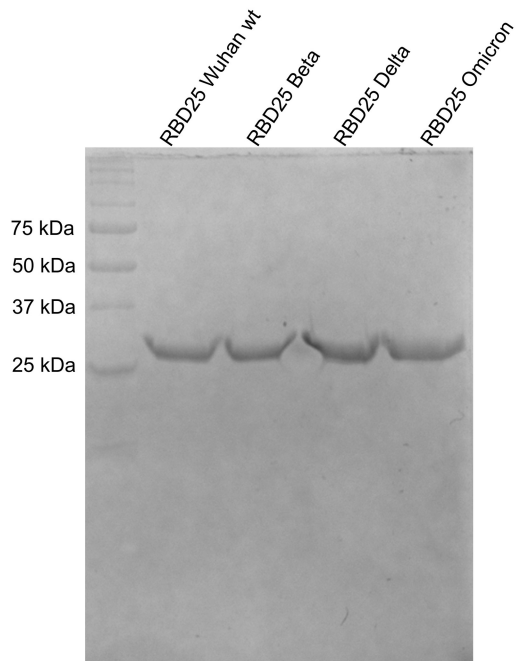

**Figure S2: MST measurements of the ACE2-hFc RBD interaction.** Triplicates were measured and Hill fit was applied.

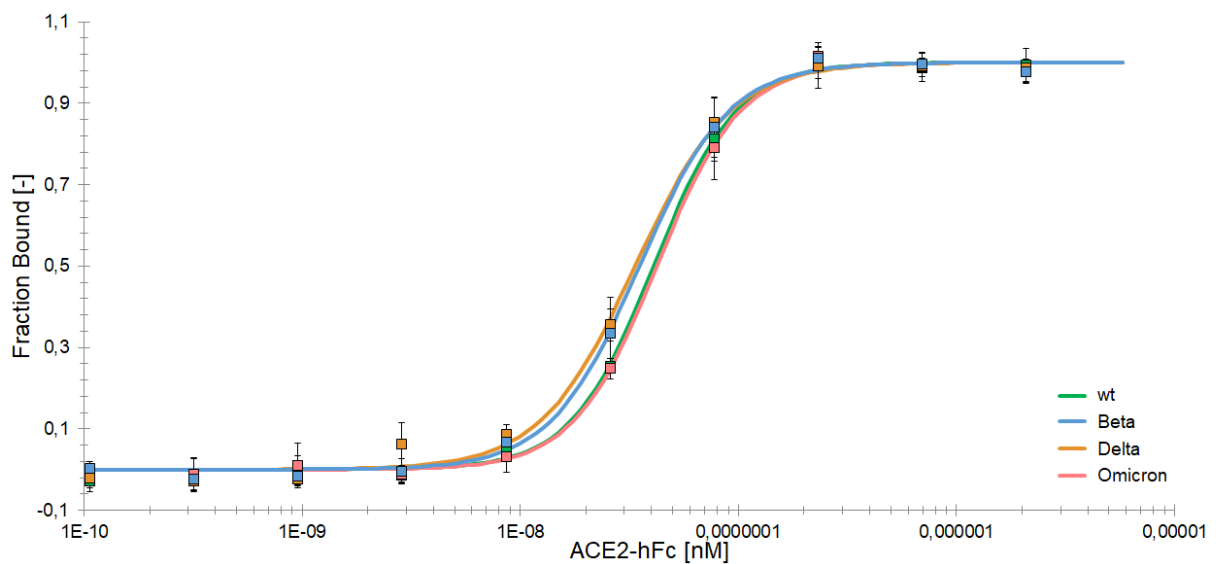

**Figure S3: Human serum from boost vaccinated persons binding to SARS-CoV-2 Wuhan original strain, Beta, Delta and Omicron RBD.** ELISA using sera from persons vaccinated first with Ad26.COV2.S and then boosted with BTN162b2 or persons fully vaccinated with a mRNA vaccine and boosted also with a mRNA vaccine. Kruskal-Wallis test with Dunn's multiple comparisons test was performed. Geometric mean and 95% confidence interval are represented by error bars.

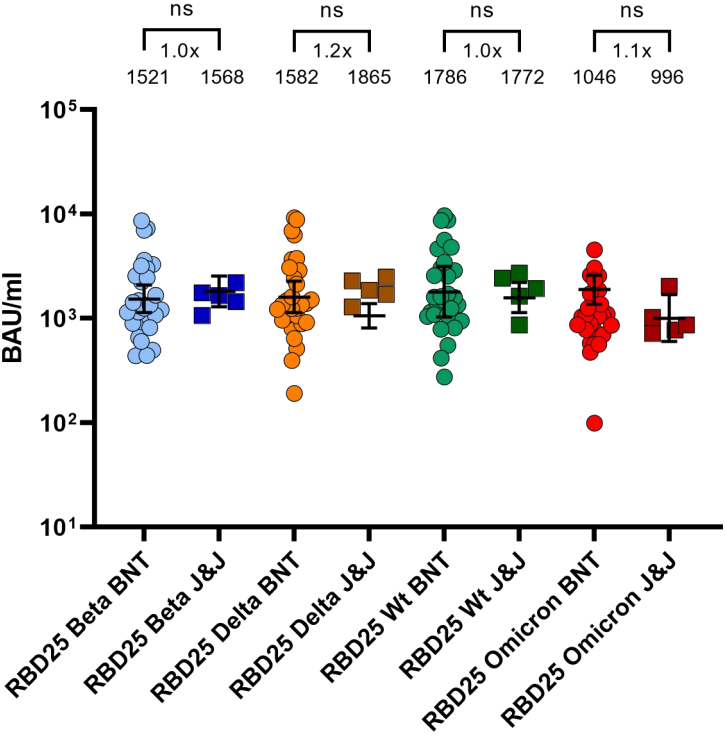

Supplement: MOESM1 [file 20189412]
